# Supplementary material for: BRCA locus-specific loss of heterozygosity in germline BRCA1 and BRCA2 carriers
Source: PubMed Central journal article supplement (PMC5567274; doi:10.1038/s41467-017-00388-9), 2017-08-22
Supplement: 41467_2017_388_MOESM1_ESM.pdf [file 41467_2017_388_MOESM1_ESM.pdf]

File Name: Supplementary Information

Description: Supplementary Figures and Supplementary Tables.

File Name: Supplementary Data 1

Description: Clinical data for BRCA1 and BRCA2 germline mutation-associated tumors analyzed by whole exome sequencing

File Name: Supplementary Data 2

Description: Locus-specific LOH data for TCGA BRCA tumors

File Name: Supplementary Data 3

Description: Locus-specific LOH data for Penn BRCA tumors

File Name: Supplementary Data 4

Description: MutSigCV Analysis of the Penn BRCA dataset

File Name: Supplementary Data 5

Description: MutSigCV Analysis of TCGA BRCA dataset

## a. TCGA Dataset

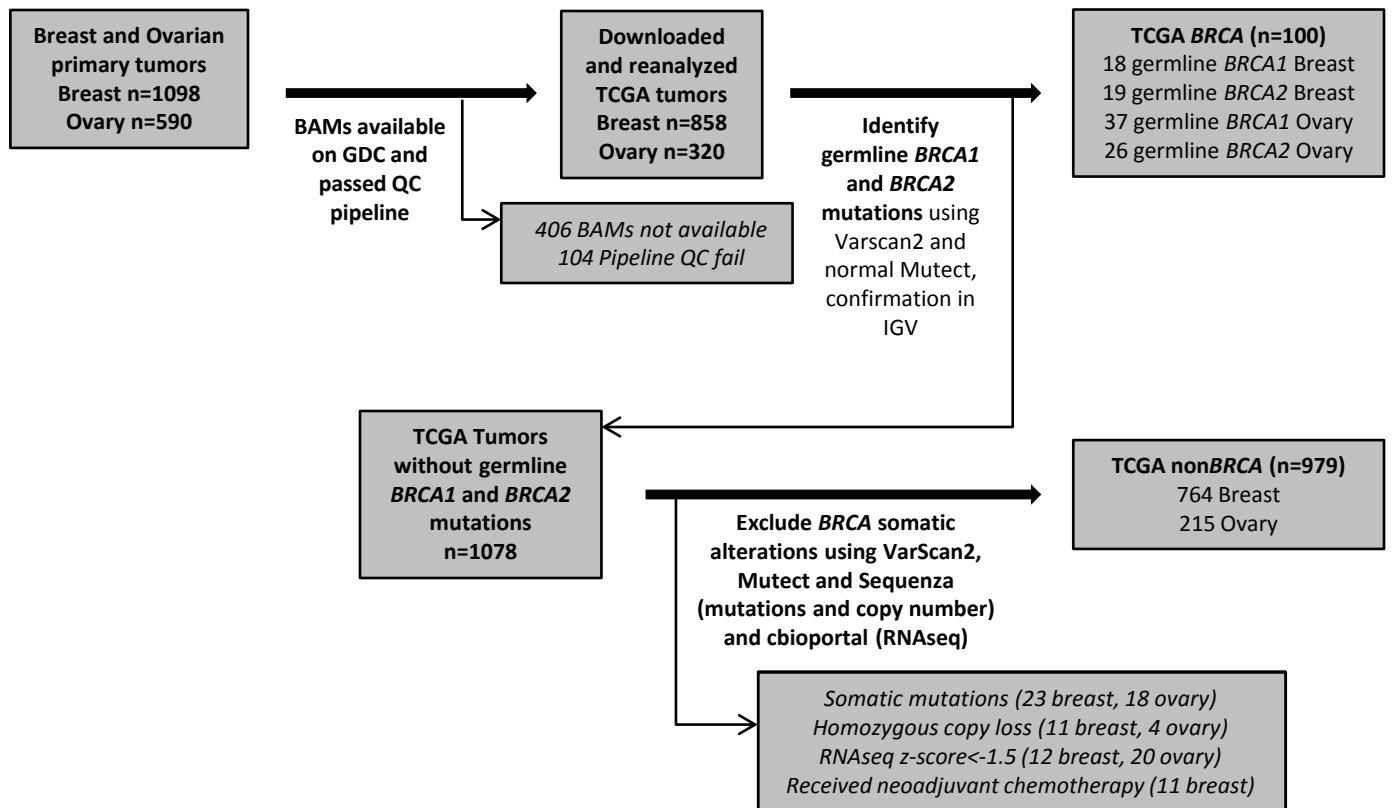

## b. Penn Dataset

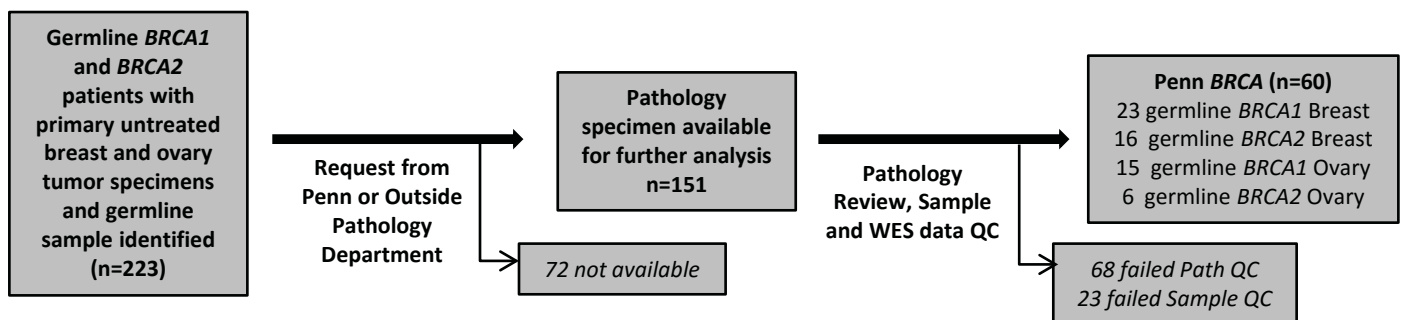

**Supplementary Figure 1: Acquisition of data for analysis from TCGA and Penn data sets. (a)** Summary overview of the methods of acquisition and analysis for the TCGA germline *BRCA* and non*BRCA* datasets. **(b)** Summary overview of the methods of acquisition and analysis for the Penn *BRCA* dataset. BAM: Binary Alignment/Map format; GDC: Genome Data Common; QC: quality control; TCGA; The Cancer Genome Atlas; IGV: Integrated Genome Viewer; WES: whole exome sequencing.

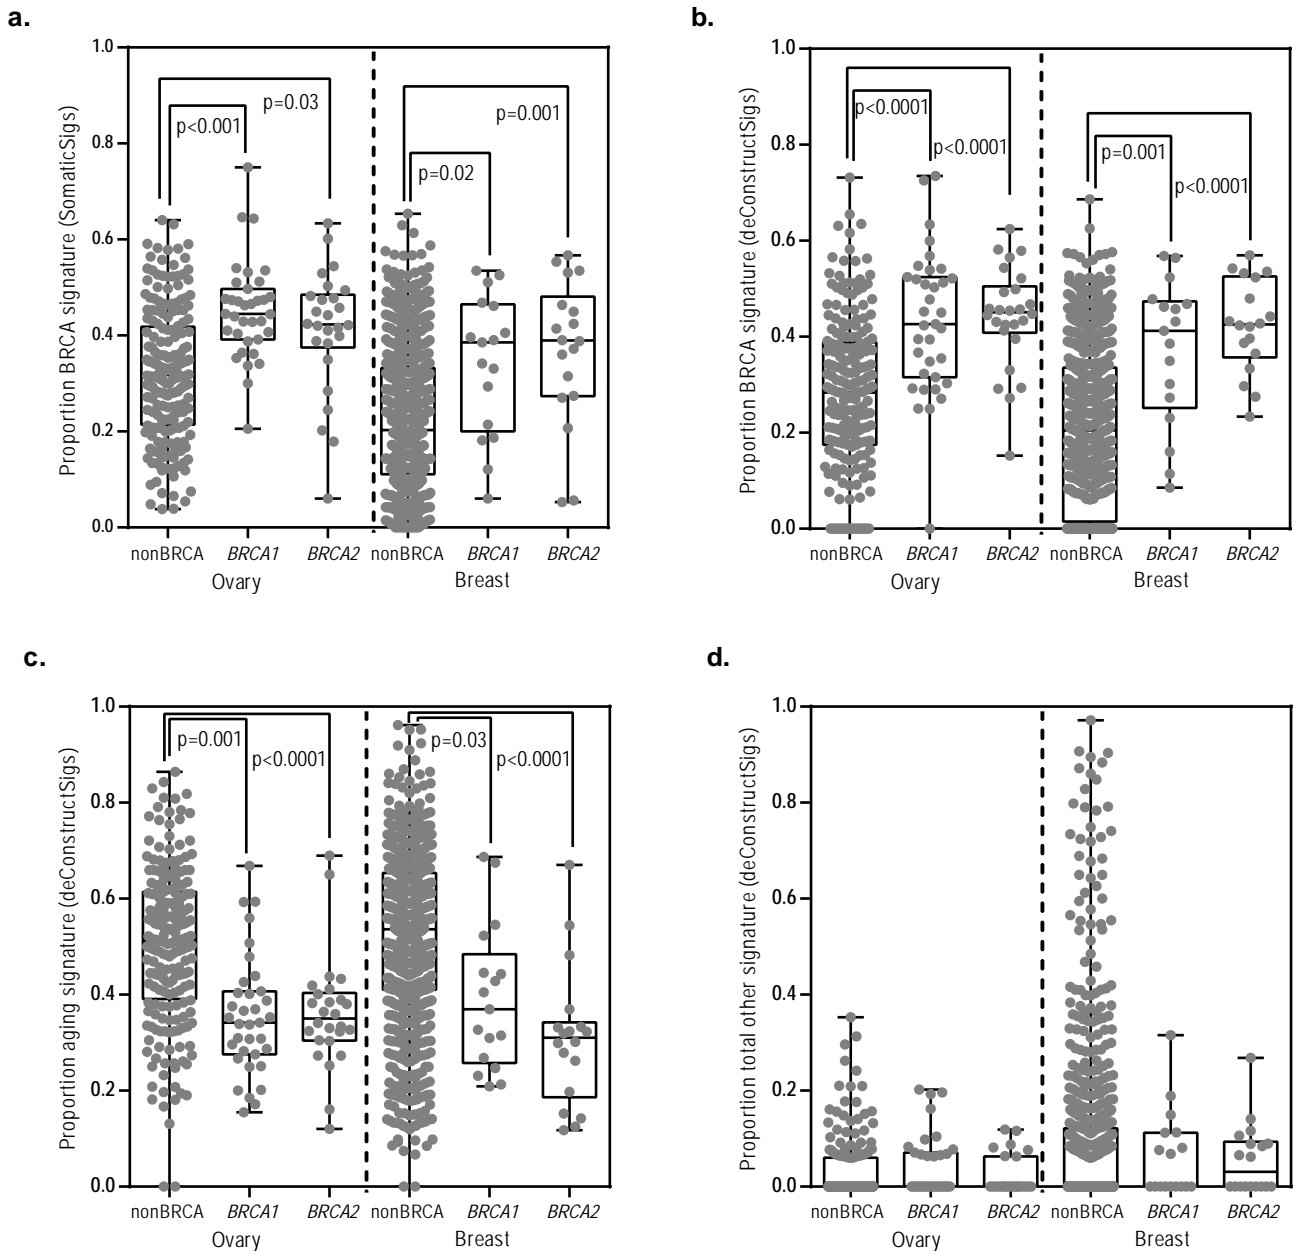

**Supplementary Figure 2: Proportion of mutational signatures by mutation and tumor type in**

**TCGA data. (a)** Proportion of mutations due to *BRCA* mutational signature for *BRCA1* and *BRCA2* germline mutation-associated breast and ovarian tumors in the TCGA as compared to non*BRCA* tumors as analyzed by nonnegative matrix factorization (NMF) with the SomaticSigs program with  $r=4$ . **(b)** Proportion of mutations due to *BRCA* mutational signature for *BRCA1* and *BRCA2* germline mutation-associated breast and ovarian tumors in the TCGA as compared to non*BRCA* tumors as analyzed by deconstructSigs. **(c)** Proportion of mutations due to aging mutational signature for *BRCA1* and *BRCA2* germline mutation-associated breast and ovarian tumors in the TCGA as analyzed by deconstructSigs. **(d)** Total proportion of mutations due to any other mutational signature for *BRCA1* and *BRCA2* germline mutation-associated breast and ovarian tumors in the TCGA as compared to non*BRCA* tumors as analyzed by deconstructSigs. For all boxplots, the center line represents the median, box limits are at the 25th and 75th percentile, and whisker limits are at the min and max of the measured value for the represented group. Three group continuous variable comparisons were performed using an ordinary one-way ANOVA with Tukey's multiple comparisons test with a single pooled variance. p-values are marked on the graphs for statistically significant comparisons, and all other comparisons are non-significant.

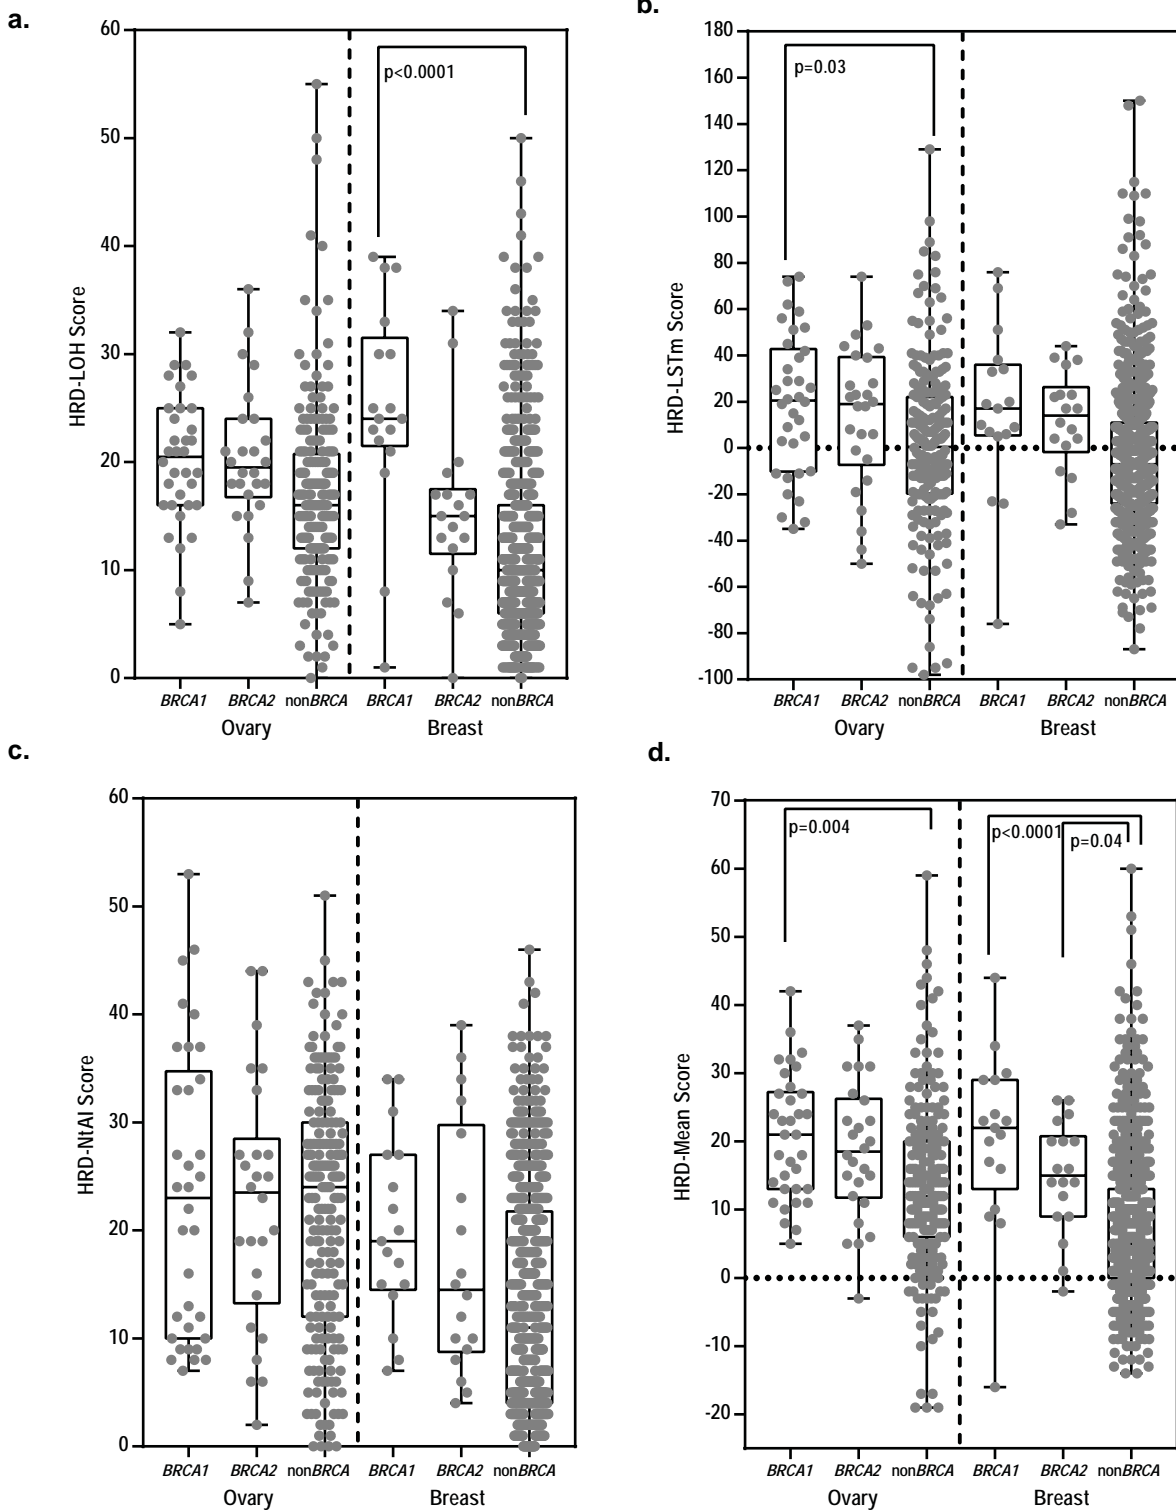

**Supplementary Figure 3: HRD scores by mutation and tumor type using analyses of TCGA data.**

**(a)** HRD-LOH scores for germline *BRCA1* and *BRCA2* breast and ovarian tumors in the TCGA as compared to nonBRCA tumors. **(b)** HRD-LST scores for germline *BRCA1* and *BRCA2* breast and ovarian tumors in the TCGA as compared to nonBRCA tumors. **(c)** HRD-NtAI scores for germline *BRCA1* and *BRCA2* breast and ovarian tumors in the TCGA as compared to nonBRCA tumors. **(d)** HRD-Mean scores for germline *BRCA1* and *BRCA2* breast and ovarian tumors in the TCGA as compared to nonBRCA tumors. For all boxplots, the center line represents the median, box limits are at the 25th and 75th percentile, and whisker limits are at the min and max of the measured value for the represented group. Three group continuous variable comparisons were performed using an ordinary one-way ANOVA with Tukey's multiple comparisons test with a single pooled variance. p-values are marked on the graphs for statistically significant comparisons, and all other comparisons are non-significant. All comparisons between *BRCA1* and *BRCA2* subgroups were nonsignificant. HRD-LOH, HRD-NtAI and HRD-mean scores were significantly higher in nonBRCA ovary versus nonBRCA breast ( $p < 0.0001$ ) for all comparisons.

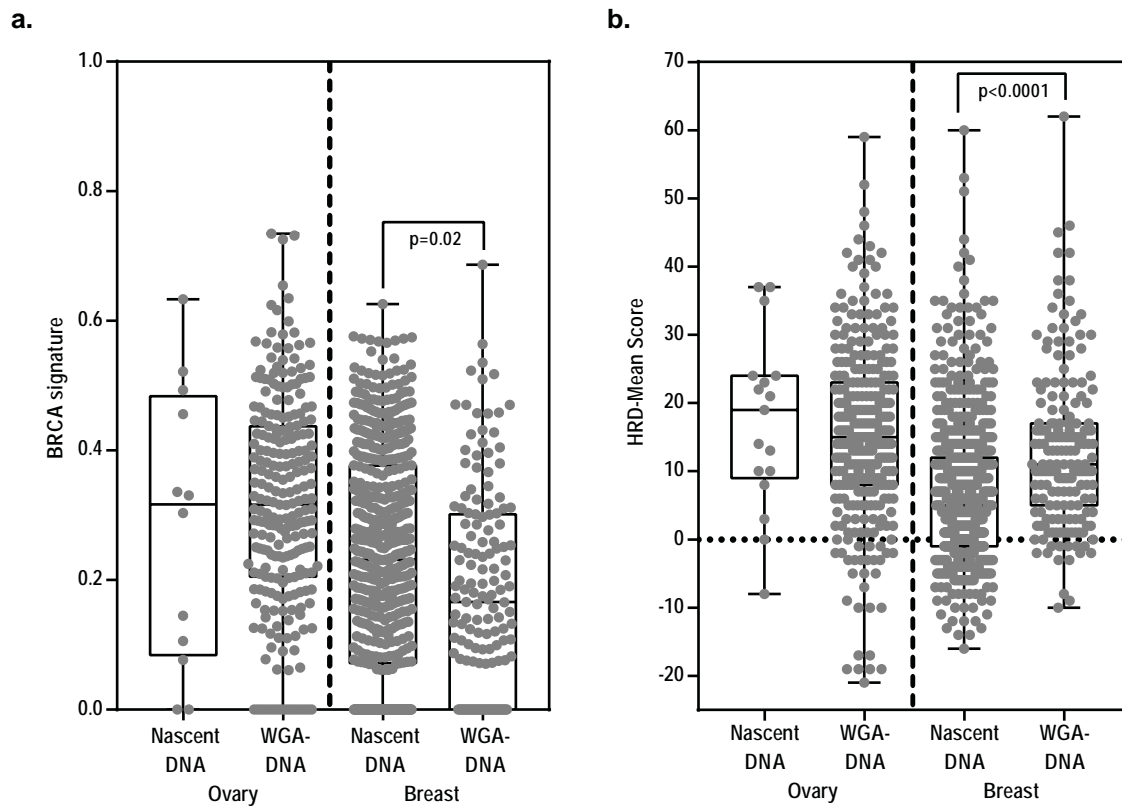

**Supplementary Figure 4: *BRCA* mutational signature and HRD-Mean scores by analyte type in TCGA data. (a)** Proportion of mutations due to *BRCA* mutational signature for TCGA breast and ovarian tumors as compared by analyte preparation method, nascent DNA versus whole genome amplified (WGA) DNA. **(b)** HRD-Mean scores for TCGA breast and ovarian tumors as compared by analyte preparation method, nascent DNA versus whole genome amplified (WGA) DNA. For all boxplots, the center line represents the median, box limits are at the 25th and 75th percentile, and whisker limits are at the min and max of the measured value for the represented group. Two group continuous variable comparisons were performed using a two-tailed Student's t-test. p-values are marked on the graphs for statistically significant comparisons, and all other comparisons are non-significant.

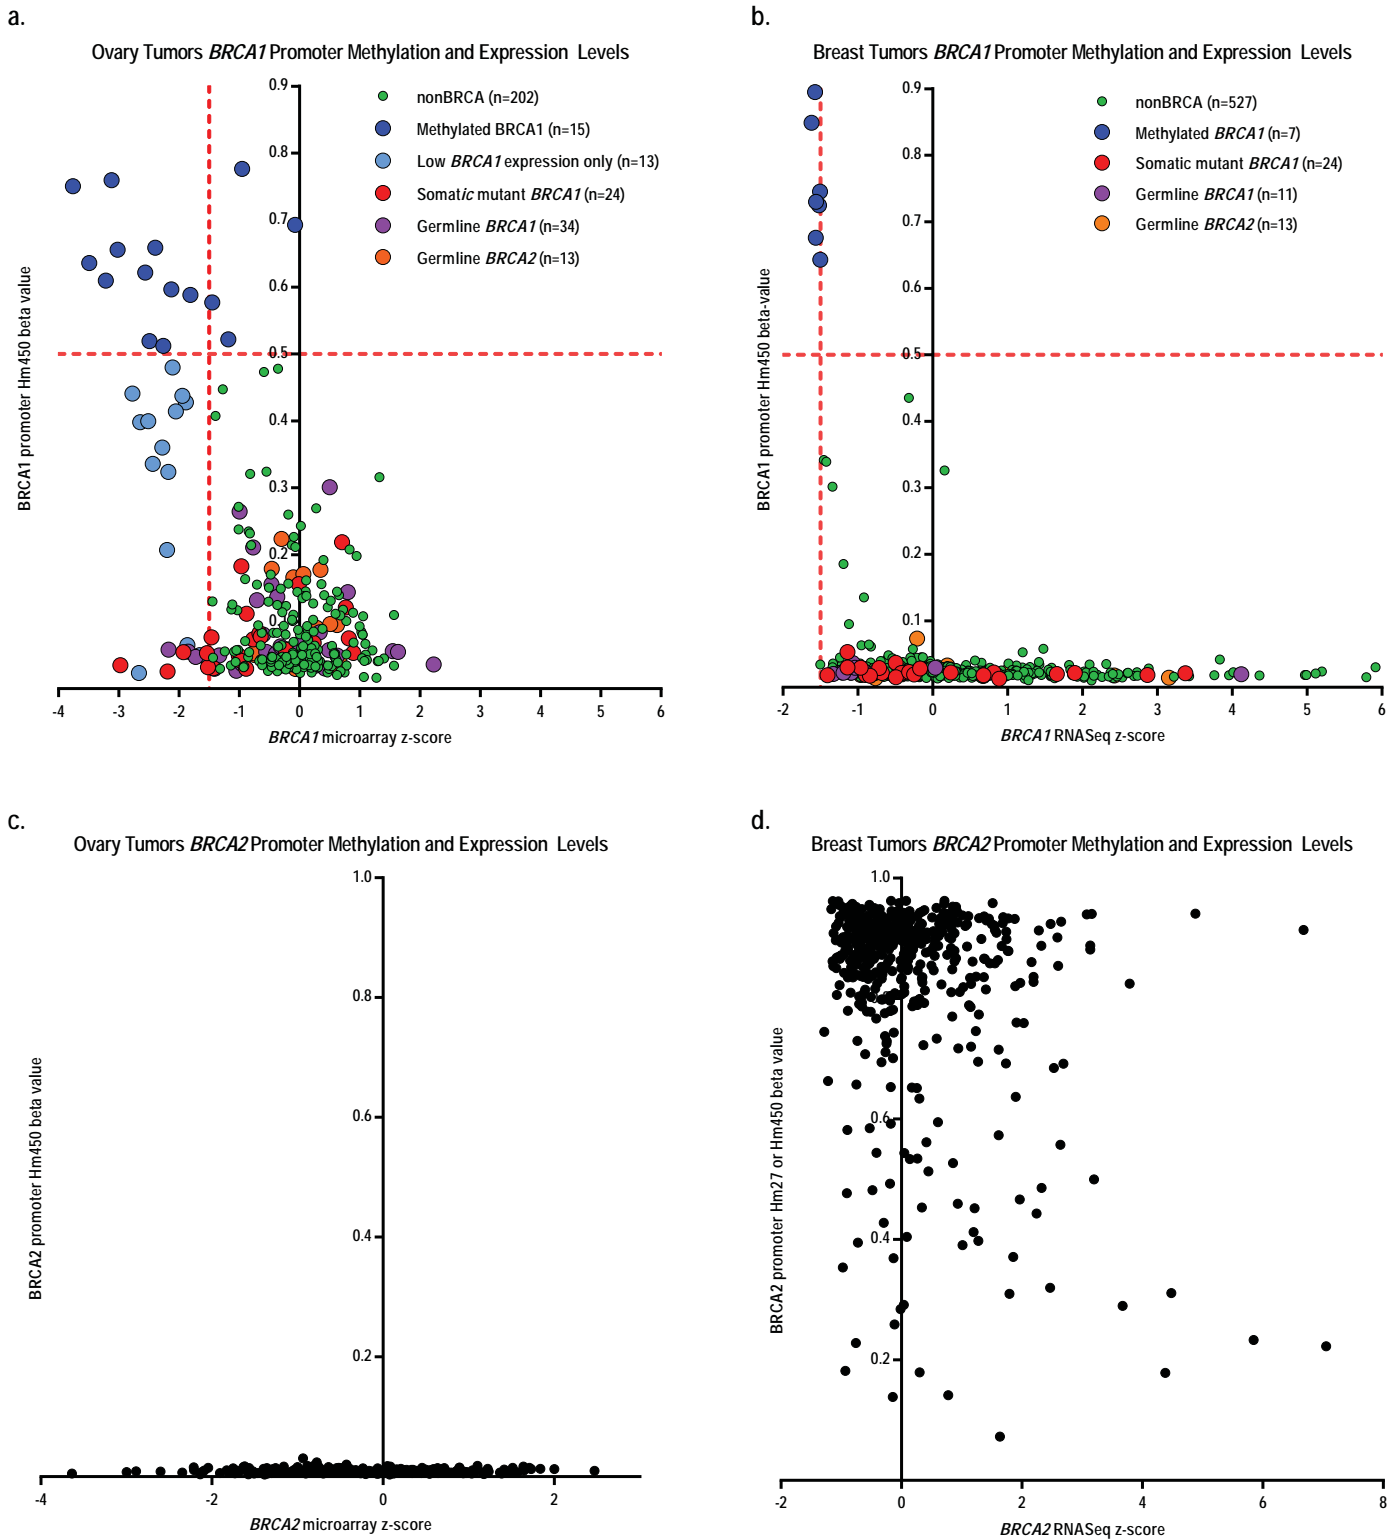

**Supplementary Figure 5: Promoter methylation studies for *BRCA1* and *BRCA2* from TCGA breast and ovarian tumors.** (a) *BRCA1* promoter Hm450 beta values plotted against *BRCA1* microarray z-scores for TCGA ovarian tumors where data was available for both values. (b) *BRCA1* promoter Hm450 beta values plotted against *BRCA1* RNASeq z-scores for TCGA breast tumors where data was available for both values. (c) *BRCA2* promoter Hm450 beta values plotted against *BRCA2* microarray z-scores for TCGA ovarian tumors where data was available for both values. (d) *BRCA2* promoter Hm450 beta values plotted against *BRCA2* RNASeq z-scores for TCGA breast tumors where data was available for both values.

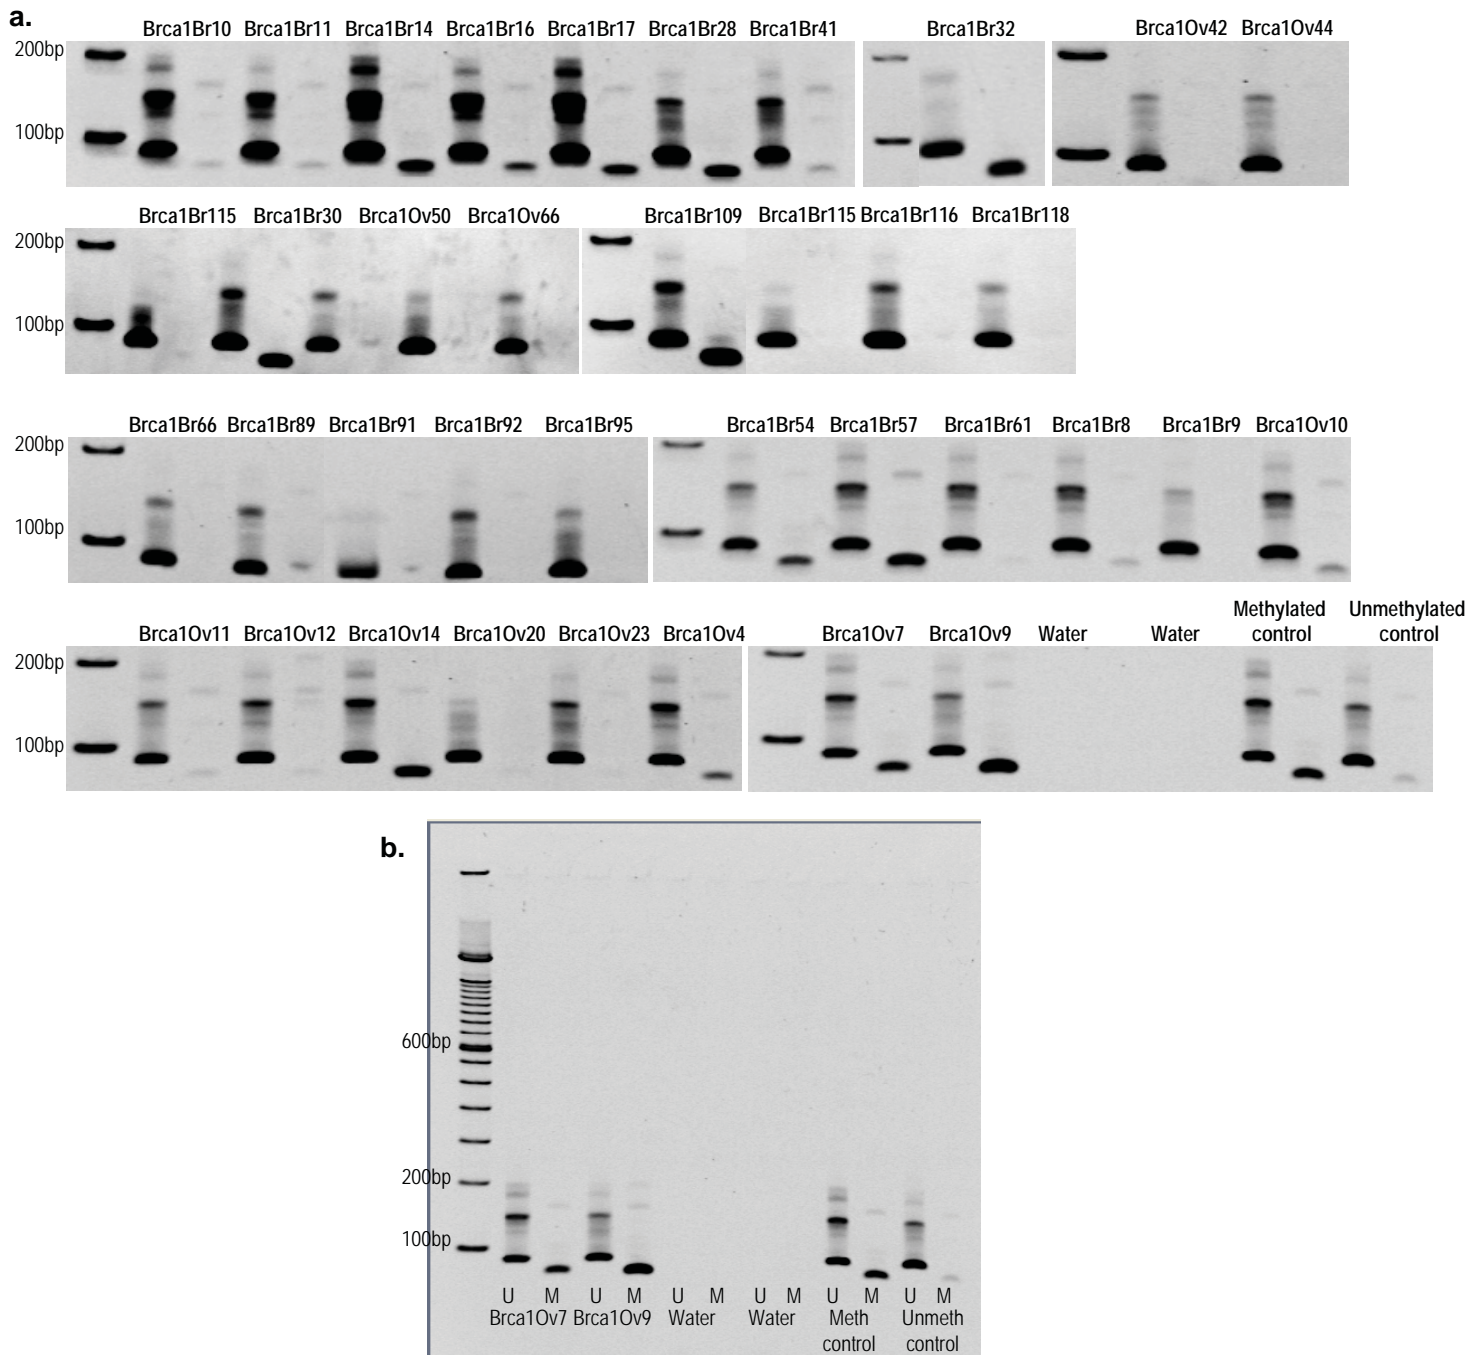

**Supplementary Figure 6: Promoter methylation by methylation specific PCR for the *BRCA1* promoter in the Penn dataset.** (a.) *BRCA1* methylation specific promoter studies for *BRCA1* germline mutation-associated tumors. Each tumor DNA is amplified with primer pair U (left set of bands) and primer pair M (right set of bands). Primer pair U amplifies unmethylated *BRCA1* promoter of an expected size of 86 base pairs (bp), and primer pair M amplifies methylated *BRCA1* promoter of an expected size of 75 base pairs, as shown for fully methylated and unmethylated control genomic DNA. The top ~150 base pair band amplified by the U primer pair is a nonspecific band. (b) Full representative gel image for Brca1Ov7, Brca1Ov9, water controls, methylated (meth) controls and unmethylated (unmeth) controls. Data shown representative of two independent PCR amplifications.



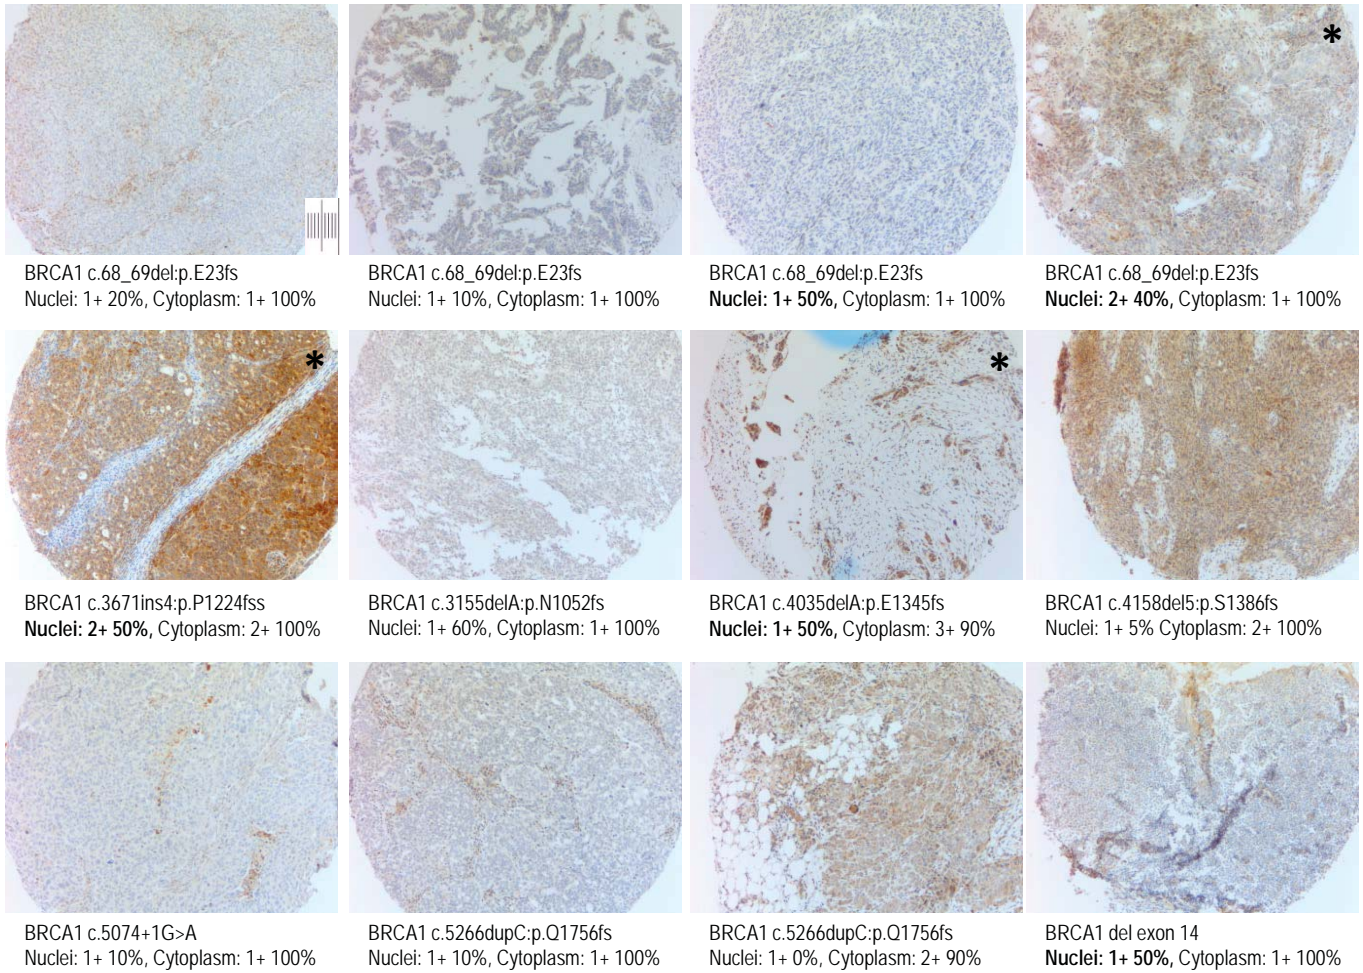

**Supplementary Figure 7:** Immunohistochemical staining for BRCA1 with antibody MS110 in *BRCA1* germline mutation-associated ovarian tumors. Staining was graded from 0 to 3+ in three cores in both tumor nuclei and normal tissue nuclei. One representative core with the maximum score for tumor nuclear staining is shown. Positive nuclear staining was defined as 100% of nuclei with at least 1+ staining in all three cores. Heterogeneous positive staining was defined as greater than 25% of nuclei with at least 1+ staining in at least one of three cores. \*Tumors without locus-specific LOH. Scale bar represents 0.1mm at 0.01mm increments.



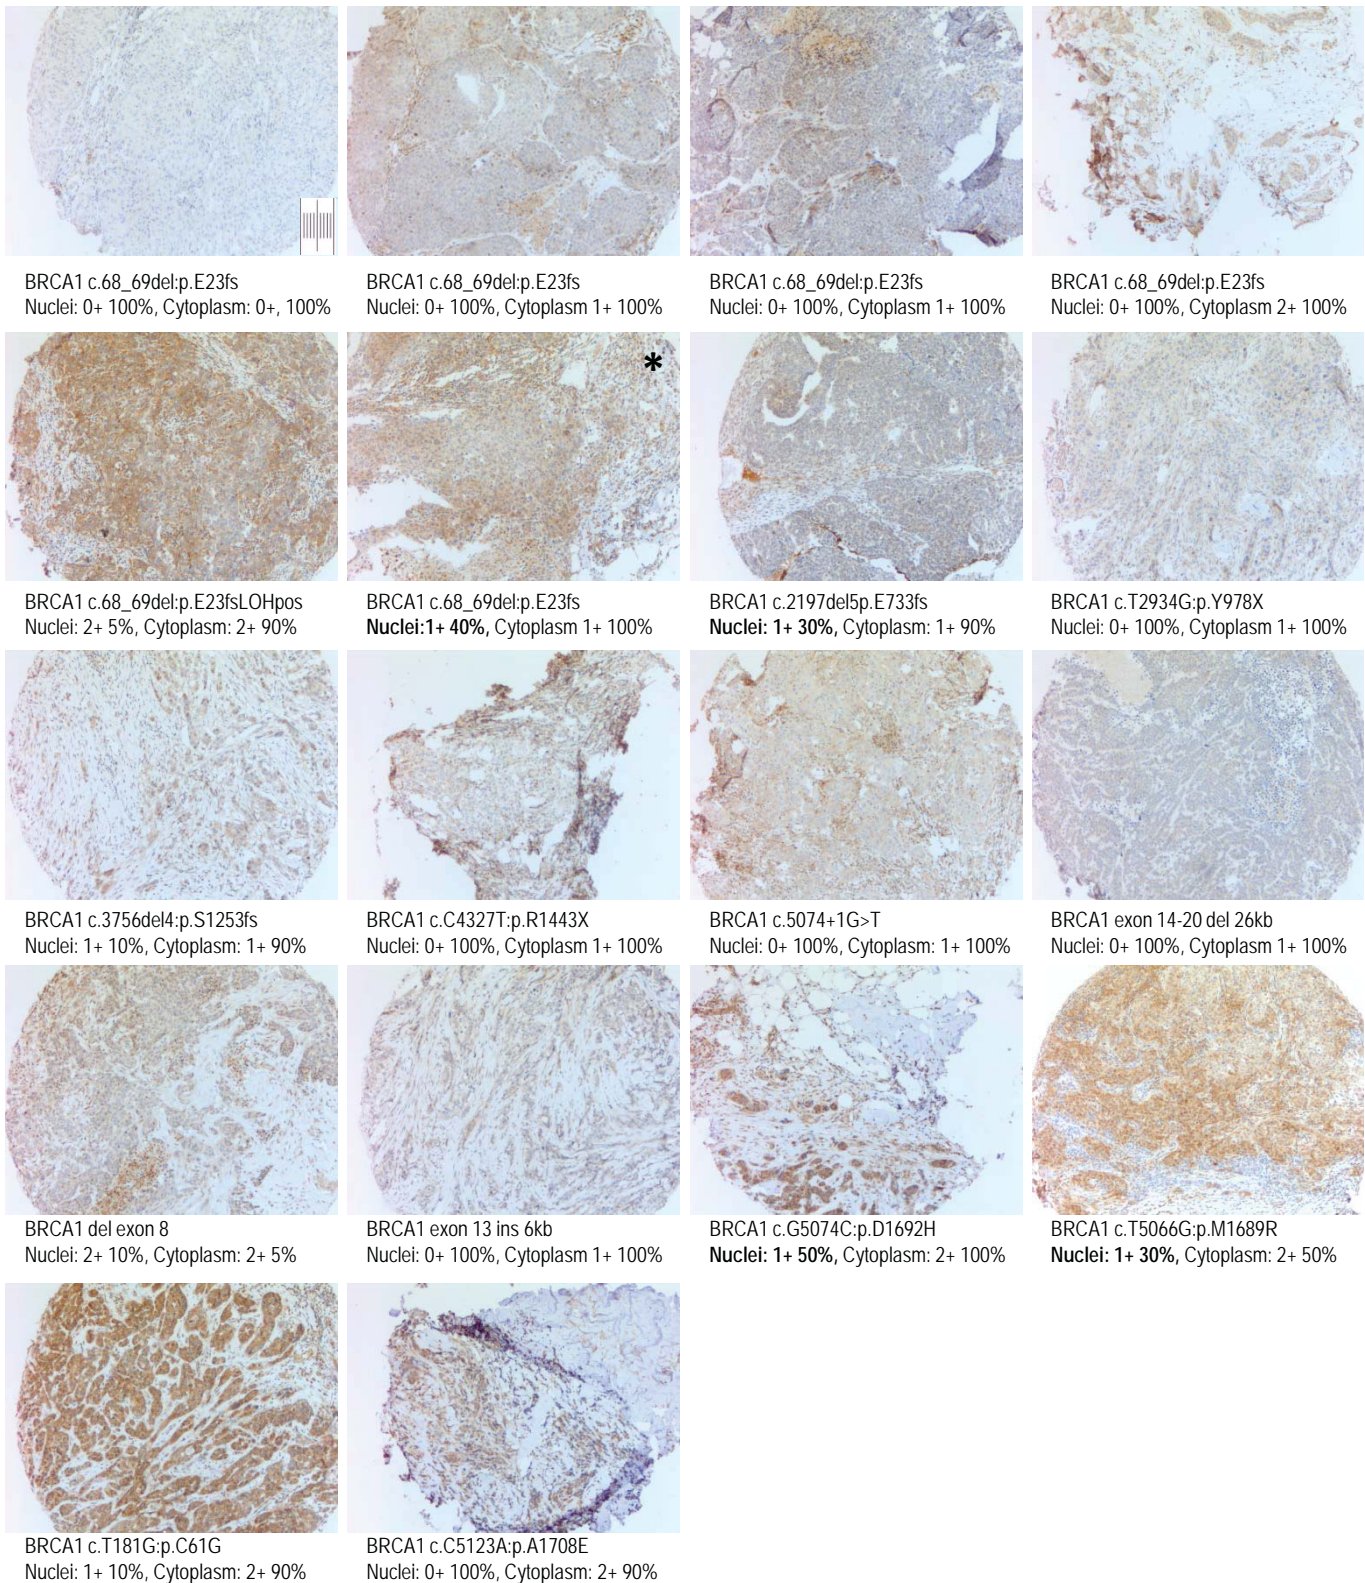

**Supplementary Figure 8:** Immunohistochemical staining for BRCA1 with antibody MS110 in *BRCA1* germline mutation-associated breast tumors. Staining was graded from 0 to 3+ in three cores in both tumor nuclei and normal tissue nuclei. One representative core with the maximum score for tumor nuclear staining is shown. Positive nuclear staining was defined as 100% of nuclei with at least 1+ staining in all three cores. Heterogeneous positive staining was defined as greater than 25% of nuclei with at least 1+ staining in at least one of three cores. \* Tumors without locus-specific LOH. Scale bar represents 0.1mm at 0.01mm increments.

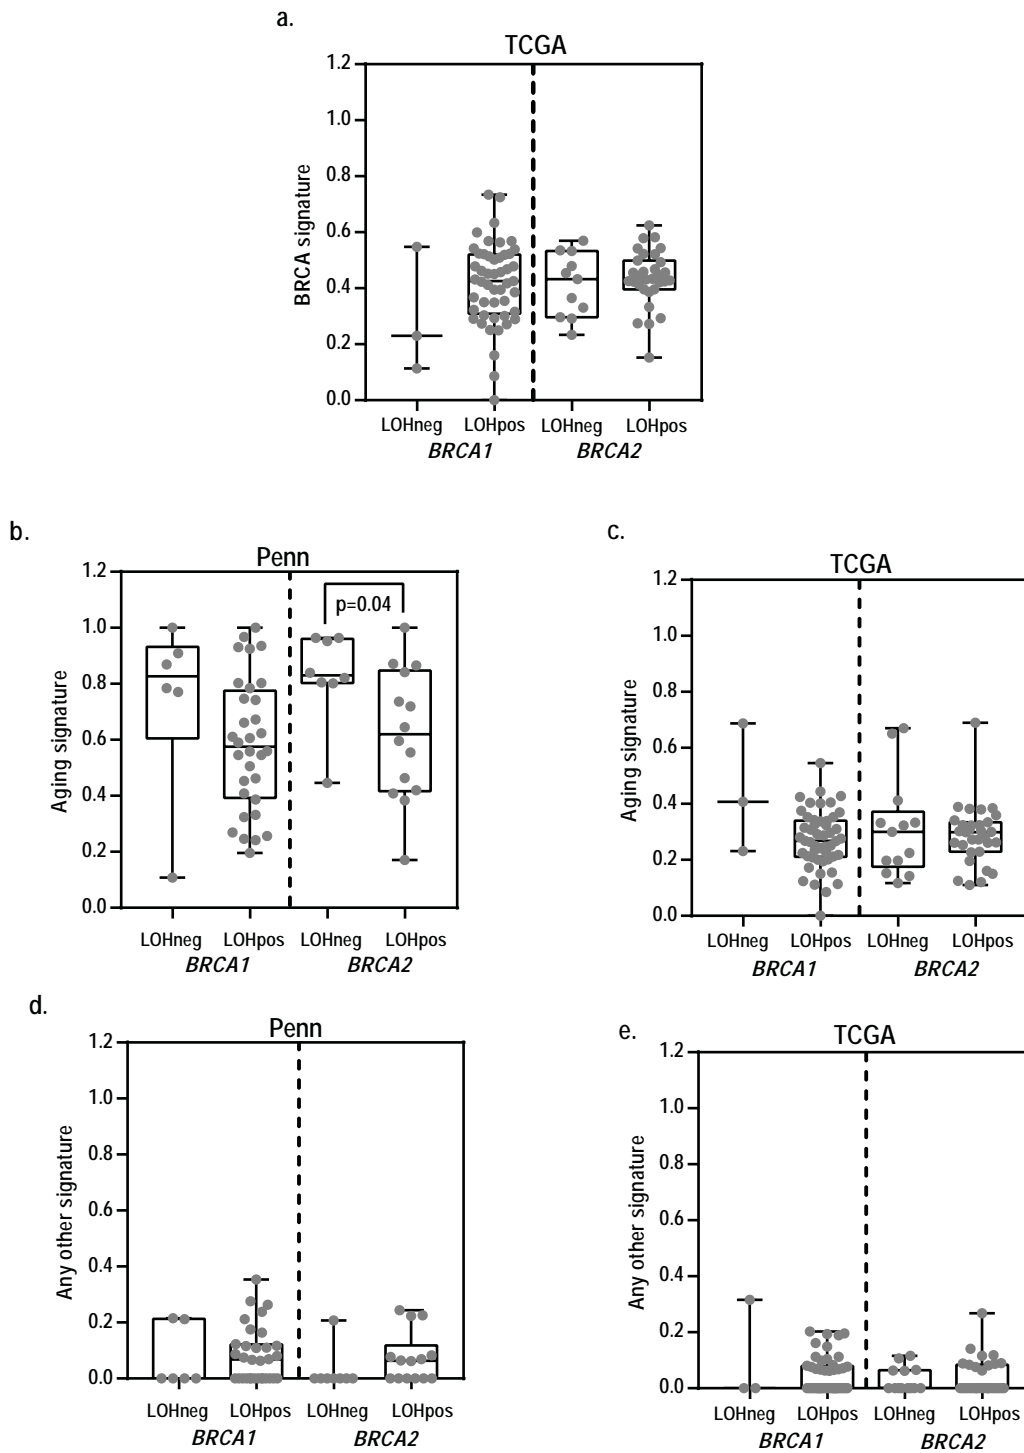

**Supplementary Figure 9: Proportion of mutational signatures in Penn and TCGA germline *BRCA1* and *BRCA2* breast and ovarian tumors with and without locus-specific LOH.** (a) Proportion of mutations due to *BRCA* mutational signature for germline *BRCA1* and *BRCA2* breast and ovarian tumors in the TCGA dataset. (b) Proportion of mutations due to aging mutational signature for germline *BRCA1* and *BRCA2* breast and ovarian tumors in the Penn dataset. (c) Proportion of mutations due to aging mutational signature for germline *BRCA1* and *BRCA2* breast and ovarian tumors in the TCGA dataset. (d) Proportion of mutations due to any other mutational signature for germline *BRCA1* and *BRCA2* breast and ovarian tumors in the Penn dataset. (e) Proportion of mutations due to any other mutational signature for germline *BRCA1* and *BRCA2* breast and ovarian tumors in the TCGA dataset. For all boxplots, the center line represents the median, box limits are at the 25th and 75th percentile, and whisker limits are at the min and max of the measured value for the represented group. Two group continuous variable comparisons were performed using a two-tailed Student's t-test. p-values are marked on the graphs for statistically significant comparisons, and all other comparisons are non-significant.

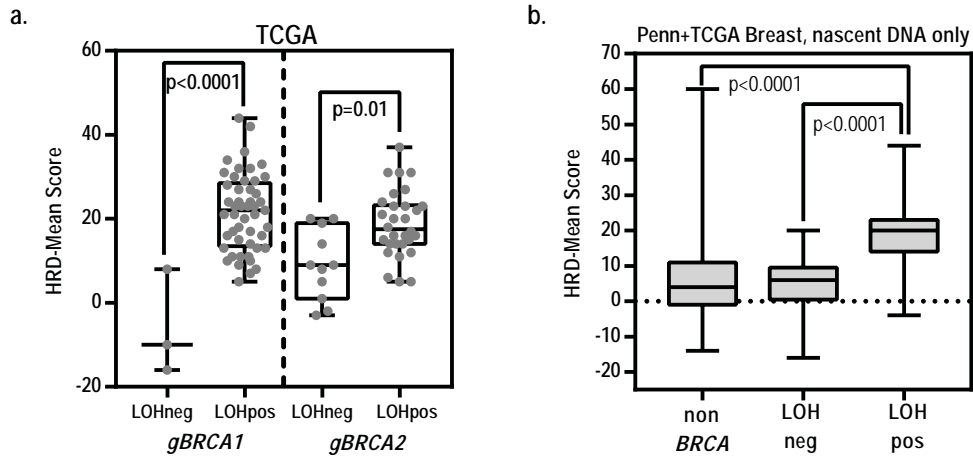

**Supplementary Figure 10: Association of HRD-Mean scores with locus-specific LOH.** (a) HRD-Mean scores in *BRCA1* and *BRCA2* tumors with (LOHpos) and without (LOHneg) locus-specific LOH in the TCGA data set. (b) HRD-Mean score comparison for combined Penn and TCGA dataset breast tumors derived from nascent DNA and excluding those derived from whole genome amplification (WGA). For all boxplots, the center line represents the median, box limits are at the 25th and 75th percentile, and whisker limits are at the min and max of the measured value for the represented group. Two group continuous variable comparisons were performed using a two-tailed Student's t-test. Three group continuous variable comparisons were performed using an ordinary one-way ANOVA with Tukey's multiple comparisons test with a single pooled variance. p-values are marked on the graphs for statistically significant comparisons, and all other comparisons are non-significant.



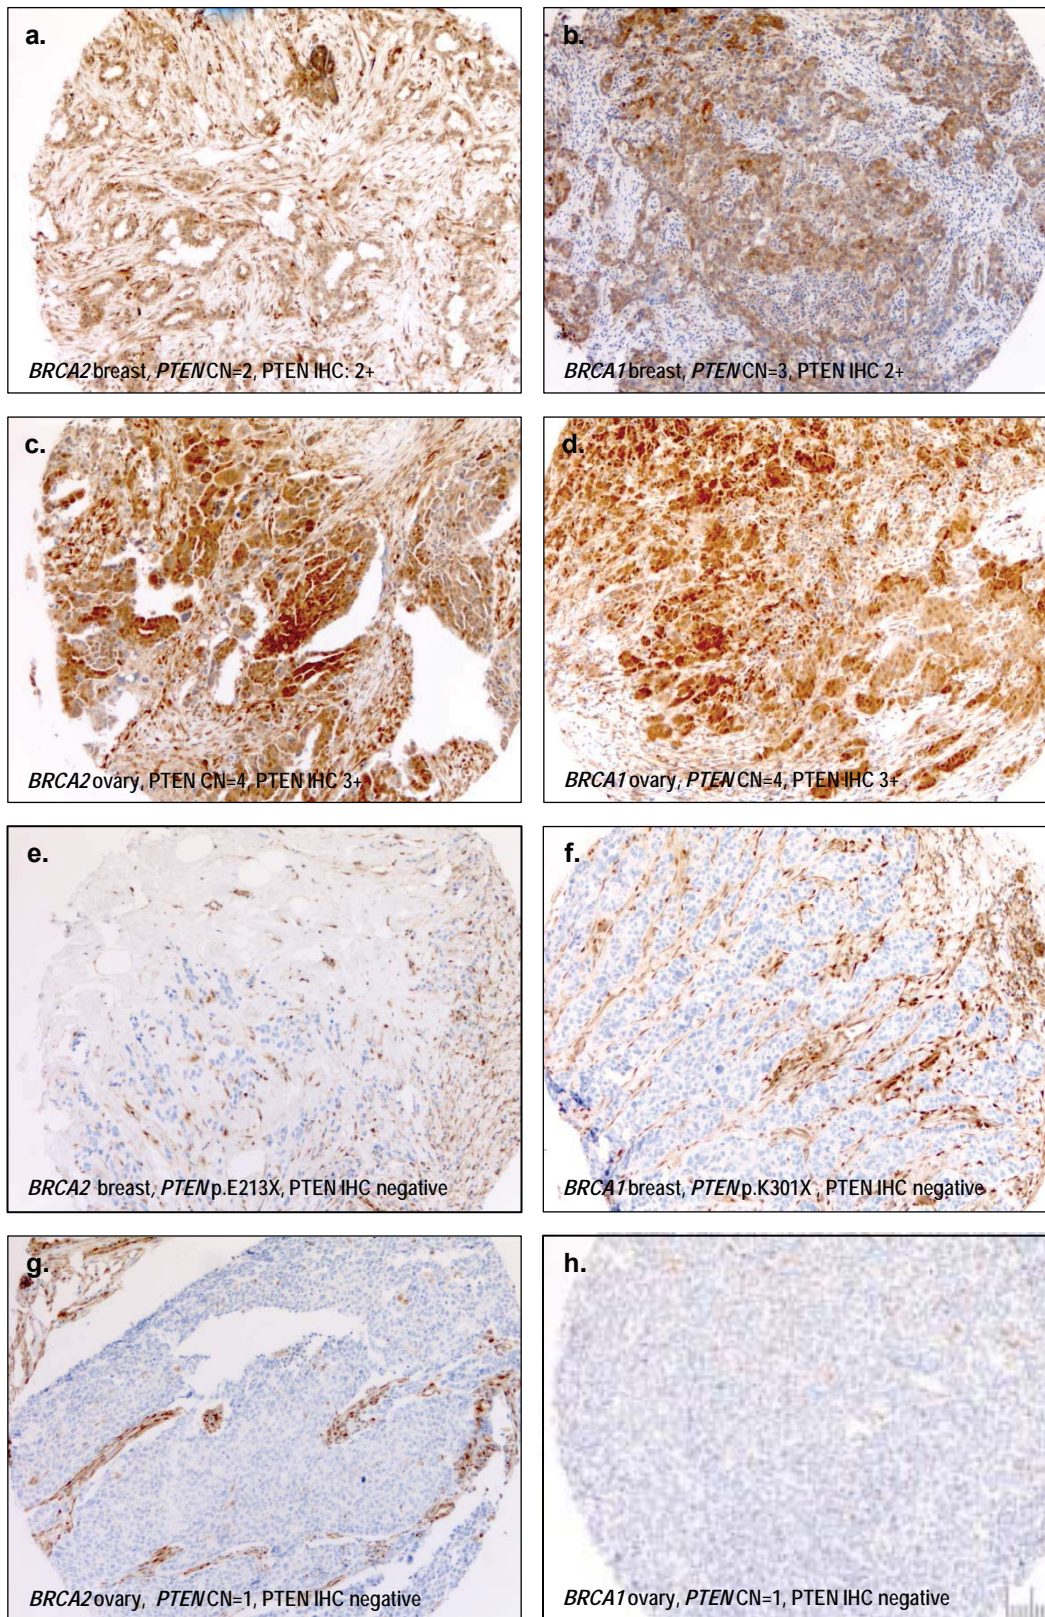

**Supplementary Figure 11: Correlation between PTEN genomic analysis and immunohistochemistry.** Representative images of immunohistochemistry (IHC) for PTEN in breast and ovarian tumors from patients with germline *BRCA1* or *BRCA2* mutations. (a) *BRCA2* breast tumor with copy number (CN) = 2 and wildtype *PTEN*, IHC score 2+. (b) *BRCA1* breast tumor with CN=3 and wildtype *PTEN*, IHC score 2+. (c) *BRCA2* ovary tumor with CN=4 and wildtype *PTEN*, IHC score 3+. (d) *BRCA1* ovary with CN=4 and wildtype *PTEN*, IHC score 3+. (e) *BRCA2* breast with a loss of function mutant *PTEN*, IHC score 0. (f) *BRCA1* breast with a loss of function mutant *PTEN*, IHC score 0. (g) *BRCA2* ovary with *PTEN* copy number loss (CN=1), IHC score 0. (h) *BRCA1* ovary with *PTEN* copy number loss (CN=1), IHC score 0. Scale bar represents 0.1mm at 0.01mm increments.

a.

Cox Proportional Hazards Model – Ovarian LOHneg vs LOHpos vs nonBRCA

| Covariate | Status  | Hazard Ratio | 95% CI    | P-value |
|-----------|---------|--------------|-----------|---------|
| *BRCA     | LOHpos  | 0.37         | 0.17-0.79 | 0.0116  |
| BRCA      | nonBRCA | 0.79         | 0.38-1.68 | 0.55    |
| Site      | TCGA    | 1.40         | 0.69-2.84 | 0.34    |
| Stage     | II      | 0.23         | 0.02-2.14 | 0.20    |
| Stage     | III     | 0.45         | 0.06-3.59 | 0.45    |

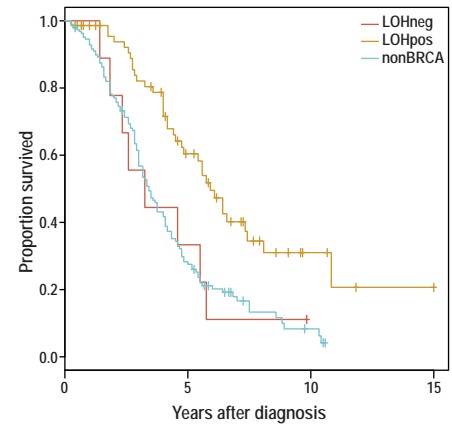

b.

Cox Proportional Hazards Model – Ovarian LOHpos vs LOHneg

| Covariate | Status | Hazard Ratio | 95% CI     | P-value |
|-----------|--------|--------------|------------|---------|
| BRCA      | BRCA2  | 0.90         | 0.48-1.71  | 0.76    |
| *LOH      | LOHpos | 0.33         | 0.14-0.74  | 0.00753 |
| Site      | TCGA   | 1.43         | 0.69-2.99  | 0.33    |
| Stage     | II     | 0.17         | 0.013-2.26 | 0.18    |
| Stage     | III    | 0.90         | 0.04-3.10  | 0.35    |

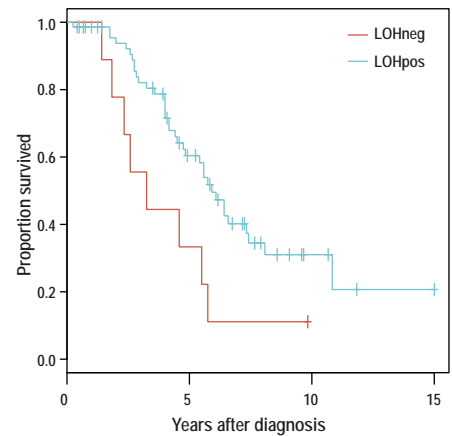

c.

Cox Proportional Hazards Model – Breast LOHneg vs LOHpos vs nonBRCA

| Covariate | Status  | Hazard Ratio | 95% CI      | P-value  |
|-----------|---------|--------------|-------------|----------|
| *BRCA     | nonBRCA | 12.08        | 0.82-176.42 | 0.034    |
| BRCA      | LOHpos  | 3.76         | 0.46-30.80  | 0.22     |
| Site      | TCGA    | 0.45         | 0.05-3.76   | 0.45     |
| Stage     | II      | 1.72         | 0.84-3.47   | 0.13     |
| *Stage    | III     | 6.11         | 2.93-12.75  | 1.44e-06 |
| HR Status | Her2+   | 1.29         | 0.75-2.22   | 0.36     |
| HR Status | TNBC    | 1.94         | 1.12-3.63   | 0.01     |

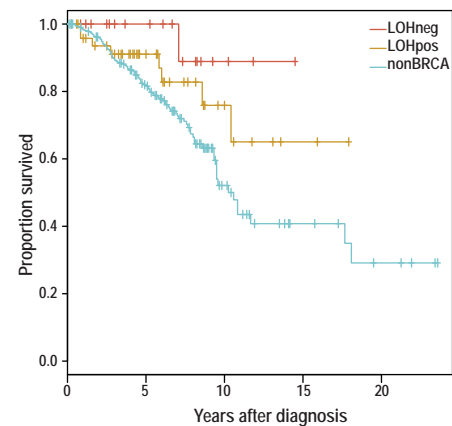

**Supplementary Figure 12: Overall survival based on locus specific LOH status in patients with germline *BRCA1* and *BRCA2* mutations using Cox proportional hazard models. (a)** Multivariate analysis using a Cox proportional hazards model comparing *BRCA1* and *BRCA2* germline mutation-associated ovarian tumors without locus specific LOH (LOHneg) to *BRCA1* and *BRCA2* germline mutation-associated ovarian tumors with locus-specific LOH (LOHpos) and nonBRCA patients in the TCGA and Penn dataset. **(b)** Multivariate analysis using a Cox proportional hazards model comparing *BRCA1* and *BRCA2* germline mutation-associated ovarian tumors without locus specific LOH (LOHneg) to *BRCA1* and *BRCA2* germline mutation-associated ovarian tumors with locus-specific LOH (LOHpos) in the TCGA and Penn dataset. **(c)** Multivariate analysis using a Cox proportional hazards model comparing *BRCA1* and *BRCA2* germline mutation-associated breast tumors without locus specific LOH (LOHneg) to *BRCA1* and *BRCA2* germline mutation-associated breast tumors with locus-specific LOH (LOHpos) and nonBRCA patients in the TCGA and Penn dataset.



**Supplementary Table 1: Clinical characteristics of the Penn and TCGA dataset population**

|                                       | Penn<br>germline<br><i>BRCA</i> (n=60) |      | TCGA<br>germline<br><i>BRCA</i><br>(n=100) |      | TCGA<br>non <i>BRCA</i><br>(n=979) |      |
|---------------------------------------|----------------------------------------|------|--------------------------------------------|------|------------------------------------|------|
| <b>Gender</b>                         |                                        |      |                                            |      |                                    |      |
| Female                                | 59                                     | 98%  | 99                                         | 99%  | 960                                | 98%  |
| <b>Germline Mutation</b>              |                                        |      |                                            |      |                                    |      |
| <i>BRCA1</i>                          | 38                                     | 63%  | 55                                         | 55%  | 0                                  | 0%   |
| <i>BRCA2</i>                          | 22                                     | 37%  | 45                                         | 45%  | 0                                  | 0%   |
| <b>Site</b>                           |                                        |      |                                            |      |                                    |      |
| Breast                                | 39                                     | 65%  | 37                                         | 37%  | 764                                | 78%  |
| Ovary                                 | 21                                     | 35%  | 63                                         | 63%  | 215                                | 22%  |
| <b>Tumor classification</b>           |                                        |      |                                            |      |                                    |      |
| Primary                               | 51                                     | 85%  | 100                                        | 100% | 979                                | 100% |
| Second primary                        | 9                                      | 15%  | 0                                          | 0%   | 0                                  | 0%   |
| <b>Age of cancer diagnosis</b>        |                                        |      |                                            |      |                                    |      |
| Breast                                | 44.7±9.7                               |      | 48.8±12.6                                  |      | 59.0±13.0                          |      |
| Ovary                                 | 54.3±7.2                               |      | 52.7±9.9                                   |      | 61.6±11.1                          |      |
| <b>Prior Chemotherapy</b>             |                                        |      |                                            |      |                                    |      |
| For another primary cancer            | 9                                      | 15%  | 0                                          | 0%   | 0                                  | 0%   |
| <b>Breast Histology</b>               |                                        |      |                                            |      |                                    |      |
| Invasive ductal carcinoma             | 33                                     | 85%  | 29                                         | 78%  | 547                                | 72%  |
| Invasive lobular carcinoma            | 1                                      | 3%   | 5                                          | 14%  | 149                                | 20%  |
| Other or Unknown                      | 5                                      | 13%  | 3                                          | 8%   | 68                                 | 9%   |
| <b>Breast Hormone Receptors</b>       |                                        |      |                                            |      |                                    |      |
| TNBC                                  | 19                                     | 49%  | 11                                         | 30%  | 108                                | 14%  |
| ER+Her2-                              | 15                                     | 38%  | 13                                         | 35%  | 416                                | 54%  |
| ER+Her2+                              | 3                                      | 8%   | 4                                          | 11%  | 111                                | 15%  |
| ER-Her2+                              | 1                                      | 3%   | 3                                          | 8%   | 32                                 | 4%   |
| Unknown ER or HER2                    | 1                                      | 3%   | 6                                          | 16%  | 97                                 | 13%  |
| <b>Breast Stage</b>                   |                                        |      |                                            |      |                                    |      |
| Stage IA/B/C                          | 18                                     | 46%  | 2                                          | 5%   | 127                                | 17%  |
| Stage IIA/IIB                         | 18                                     | 46%  | 24                                         | 65%  | 441                                | 58%  |
| Stage IIIA/B/C                        | 3                                      | 8%   | 9                                          | 24%  | 170                                | 22%  |
| Stage IV                              | 0                                      | 0%   | 0                                          | 0%   | 11                                 | 1%   |
| Unstaged                              | 0                                      | 0%   | 2                                          | 5%   | 15                                 | 2%   |
| <b>Ovary Histology</b>                |                                        |      |                                            |      |                                    |      |
| Epithelial ovarian cancer             | 19                                     | 90%  | 63                                         | 100% | 215                                | 100% |
| Carcinosarcoma                        | 2                                      | 10%  | 0                                          | 0%   | 0                                  | 0%   |
| <b>Ovarian Cancer Stage</b>           |                                        |      |                                            |      |                                    |      |
| Stage I/II                            | 5                                      | 24%  | 3                                          | 5%   | 12                                 | 6%   |
| Stage III                             | 11                                     | 52%  | 48                                         | 76%  | 165                                | 77%  |
| Stage IV                              | 3                                      | 14%  | 10                                         | 16%  | 37                                 | 17%  |
| Unstaged                              | 1                                      | 5%   | 2                                          | 3%   | 1                                  | 0%   |
| <b>DNA Preparation for Sequencing</b> |                                        |      |                                            |      |                                    |      |
| Nascent DNA                           | 60                                     | 100% | 33                                         | 33%  | 581                                | 59%  |
| Whole Genome Amplified                | 0                                      | 0%   | 67                                         | 67%  | 398                                | 41%  |

**Supplementary Table 2: Details on individual tumors without locus specific LOH**

| Tumor     | Gene  | Mutation    | Subtype       | Age of dx | 2nd hit <sup>1</sup> | BRCA1 IHC <sup>2</sup> | HRD-Mean <sup>3</sup> | Aging Sig | BRCA Sig | Other Mut Sigs | Mut Load <sup>5</sup> | TP53; PTEN Status <sup>6</sup> |
|-----------|-------|-------------|---------------|-----------|----------------------|------------------------|-----------------------|-----------|----------|----------------|-----------------------|--------------------------------|
| Brca1Br11 | BRCA1 | p.E23fs     | TNBC          | 39        | No                   | +/+                    | 9↓                    | 0.87      | 0.12↓    | none           | 1.08↑                 | Mut; +                         |
| Brca1Br9  | BRCA1 | p.E23fs     | TNBC          | 55        | No                   | nd                     | 11↓                   | 0.77      | 0.18↓    | none           | 1.32↑                 | Mut; -                         |
| Brca1Br16 | BRCA1 | c.5074+1G>T | ER+Her2- IDC  | 40        | No                   | 0/+                    | 2↓                    | 0.78      | 0.00↓    | 2 (0.12)       | 0.06↓                 | WT; -                          |
| AR-A1AM   | BRCA1 | p.N1355fs   | ER+Her2- ILC  | 52        | No                   | n/a                    | -16↓                  | 0.69      | 0.23↓    | none           | 2.86↑                 | WT; +                          |
| A1-A0SH   | BRCA1 | p.C61G      | TNBC          | 39        | SM <sup>7</sup>      | n/a                    | 8↓                    | 0.23      | 0.11↓    | 2 (0.32)       | 2.52↓                 | WT; +                          |
| Brca1Ov13 | BRCA1 | p.E1345fs   | Ovarian HGPSC | 53        | No                   | 0/+++                  | 3↓                    | 1.00      | 0.00↓    | none           | 1.02↑                 | WT; +                          |
| Brca1Ov7  | BRCA1 | p.E23fs     | Ovarian MMT   | 57        | PM                   | +/+                    | 1↓                    | 0.79      | 0.00↓    | 2 (0.13)       | 0.28↓                 | Mut; -                         |
| Brca1Ov9  | BRCA1 | p.P1224fs   | Ovarian HGPSC | 53        | PM                   | +/+++                  | 9↓                    | 0.91      | 0.00↓    | none           | 0.92↓                 | Mut; +                         |
| 13-0883   | BRCA1 | p.Q1756fs   | Ovarian HGPSC | 61        | No                   | n/a                    | -10↓                  | 0.41      | 0.55↑    | none           | 2.20↓                 | WT; +                          |
| Brca2Br8  | BRCA2 | p.L2253fs   | ER+Her2- IDC  | 37        | No                   | n/a                    | -2↓                   | 0.96      | 0.00↓    | none           | 0.76↓                 | WT; +                          |
| Brca2Br21 | BRCA2 | c.8487+1G>A | ER+Her2- IDC  | 39        | No                   | n/a                    | 7↓                    | 0.96      | 0.00↓    | none           | 0.76↓                 | WT; -                          |
| Brca2Br11 | BRCA2 | p.Y1655X    | ER+Her2- IDC  | 46        | No                   | n/a                    | 9↓                    | 0.82      | 0.17↑    | none           | 0.50↓                 | WT; +                          |
| Brca2Br7  | BRCA2 | p.Y91fs     | ER+Her2- IDC  | 33        | No                   | n/a                    | 18↑                   | 0.80      | 0.09↓    | none           | 0.52↓                 | WT; +                          |
| Brca2Br3  | BRCA2 | p.Y352fs    | ER+Her2- IDC  | 50        | No                   | n/a                    | -1↓                   | 0.45      | 0.00↓    | 13 (0.14)      | 0.56↓                 | WT; +                          |
| Brca2Br32 | BRCA2 | p.N2879fs   | ER+Her2- ILC  | 52        | No                   | n/a                    | 5↓                    | 0.95      | 0.00↓    | none           | 0.26↓                 | WT; -                          |
| Brca2Br1  | BRCA2 | p.S1982fs   | TNBC          | 70        | No                   | n/a                    | 2↓                    | 0.81      | 0.00↓    | none           | 0.30↓                 | WT; +                          |
| A8-A09A   | BRCA2 | p.E1953X    | ER+Her2- IDC  | 40        | No                   | n/a                    | 20↑                   | 0.20      | 0.54↑    | none           | 5.56↑                 | WT; +                          |
| AO-A03V   | BRCA2 | p.S1982fs   | ER+Her2- IDC  | 41        | No                   | n/a                    | 20↑                   | 0.14      | 0.43↑    | none           | 1.92↓                 | Mut; -                         |
| BH-A0AZ   | BRCA2 | p.S1955X    | ER+Her2- IDC  | 47        | No                   | n/a                    | 14↓                   | 0.32      | 0.36↓    | 2 (0.12)       | 1.62↓                 | WT; +                          |
| D8-A1JD   | BRCA2 | p.P2283fs   | ER+Her2- IDC  | 41        | No                   | n/a                    | 5↓                    | 0.12      | 0.57↑    | none           | 4.08↑                 | WT; +                          |
| E9-A1NE   | BRCA2 | p.T1325fs   | ER+Her2- IDC  | 28        | No                   | n/a                    | 9↓                    | 0.54      | 0.30↓    | none           | 1.38↓                 | WT; -                          |
| AC-A3BB   | BRCA2 | p.T219fs    | ER+Her2- ILC  | 46        | No                   | n/a                    | 1↓                    | 0.67      | 0.23↓    | none           | 27.4↑                 | WT; +                          |
| EW-A1PD   | BRCA2 | p.T256fs    | ER+Her2+ IDC  | 61        | No                   | n/a                    | 9↓                    | 0.33      | 0.48↑    | none           | 3.00↑                 | WT; +                          |
| EW-A1P7   | BRCA2 | p.D2161fs   | TNBC          | 59        | No                   | n/a                    | -2↓                   | 0.15      | 0.53↑    | none           | 2.02↓                 | WT; +                          |
| A2-A0T0   | BRCA2 | p.T2314fs   | TNBC          | 59        | SM <sup>8</sup>      | n/a                    | 26↑                   | 0.33      | 0.44↑    | none           | 4.54↑                 | WT; -                          |
| Brca2Ov13 | BRCA2 | p.Q1056fs   | Ovarian HGPSC | 53        | No                   | n/a                    | 0↓                    | 0.84      | 0.16↑    | none           | 0.02↓                 | WT; +                          |
| 24-0975   | BRCA2 | c.631+2T>G  | Ovarian HGPSC | 58        | No                   | n/a                    | 8↓                    | 0.40      | 0.45↑    | none           | 2.50↓                 | Mut; +                         |
| 24-2293   | BRCA2 | p.R2520X    | Ovarian HGPSC | 47        | No                   | n/a                    | -3↓                   | 0.65      | 0.29↓    | none           | 2.32↓                 | Mut; +                         |
| 13-0751   | BRCA2 | p.L1521fs   | Ovarian HGPSC | 44        | No                   | n/a                    | 19↑                   | 0.41      | 0.33↓    | 10 (0.06)      | 1.52↓                 | Mut; +                         |
| 13-1498   | BRCA2 | p.S1982fs   | Ovarian HGPSC | 73        | * <sup>9</sup>       | n/a                    | 35↑                   | 0.30      | 0.56↑    | none           | 3.20↑                 | Mut; -                         |

<sup>1</sup>SM: somatic mutation, PM:promoter methylation

<sup>2</sup>IHC score see Table X

<sup>3</sup>HRD-Mean for tumors with locus-specific LOH (Mean±SD): Penn BRCA1: 21±2; Penn BRCA2: 15±3; TCGA BRCA1: 21±9; TCGA BRCA2: 19±8

<sup>4</sup>BRCA signature for tumors with locus-specific LOH (Mean±SD): Penn BRCA1:0.20±0.13; Penn BRCA2:0.16±0.12; TCGA BRCA1:0.42±0.15; TCGA BRCA2: 0.43±0.09

<sup>5</sup>Mutational burden for tumors with locus-specific LOH (Mean±SD): Penn BRCA1: 1.00±0.37; Penn BRCA2:1.45±1.08; TCGA BRCA1:2.80±0.97; TCGA BRCA2: 2.69±1.10

<sup>6</sup>TP53 status is either mutant (mut) or wildtype (WT); PTEN status is either lost or retained

<sup>7</sup>A1-A0SH also has somatic BRCA1 p.Q934X at 21% AF

<sup>8</sup>A2-A0T0 tumor also has somatic BRCA2 p.L2926X at 35% AF

<sup>9</sup>13-1498 also has a germline RAD51D mutation with locus-specific LOH in the tumor

**Supplementary Table 3: Somatic mutations identified in *BRCA1* and *BRCA2* germline mutation-associated tumors**

| Tumor Class <sup>1</sup>   | ≥1 mutation |     | DNA repair, Chromatin |     |                                                                           | Structural |     |                             | Cell cycle |     |                      | Oncogenic signaling |     |                                                                                         |
|----------------------------|-------------|-----|-----------------------|-----|---------------------------------------------------------------------------|------------|-----|-----------------------------|------------|-----|----------------------|---------------------|-----|-----------------------------------------------------------------------------------------|
|                            | n           | %   | n                     | %   | Genes                                                                     | n          | %   | Genes                       | n          | %   | Genes                | n                   | %   | Genes                                                                                   |
| <b>BRCA1 Breast</b>        |             |     |                       |     |                                                                           |            |     |                             |            |     |                      |                     |     |                                                                                         |
| LOHneg (n=5)               | 3           | 60% | 0                     | 0%  | -                                                                         | 1          | 20% | MYO5A                       | 0          | 0%  | -                    | 2                   | 40% | BMPR1A, PTEN                                                                            |
| LOHpos (n=35) <sup>1</sup> | 12          | 34% | 6                     | 17% | KDM6A(2), BLM, DNMT3A, ERCC6, NCOR2                                       | 3          | 9%  | CDH15, FAT1, NUP98, PPFIBP1 | 0          | 0%  | -                    | 7                   | 20% | NF1 (2), BCL2L2, CREBBP, FGFR2, NOTCH2, PIK3C2G                                         |
| <b>BRCA1 Ovary</b>         |             |     |                       |     |                                                                           |            |     |                             |            |     |                      |                     |     |                                                                                         |
| LOHneg (n=4)               | 0           | 0%  | 0                     | 0%  | -                                                                         | 0          | 0%  | -                           | 0          | 0%  | -                    | 0                   | 0%  | -                                                                                       |
| LOHpos (n=46) <sup>1</sup> | 25          | 54% | 11                    | 24% | ARID1A(2), APEX1, DDB1, ERCC6, LIG4, NSD1, PARP4, POLR2A, POLM, TDG, UBR5 | 3          | 7%  | COL7A1, FAT3                | 3          | 7%  | RB1 (2), MITF        | 14                  | 30% | NF1 (3), ABL1, BTK, CHUK, DAXX, JAK3, KRAS, MAP3K13, MAP3K15, MTOR, PIK3CA, PRKCG, PTEN |
| <b>BRCA2 Breast</b>        |             |     |                       |     |                                                                           |            |     |                             |            |     |                      |                     |     |                                                                                         |
| LOHneg (n=16) <sup>1</sup> | 3           | 19% | 1                     | 6%  | POLR2A, SMARCA4                                                           | 2          | 13% | EXT1, NUP98, NVASC          | 0          | 0%  | -                    | 2                   | 13% | CDK12, PIK3CA                                                                           |
| LOHpos (n=18)              | 12          | 67% | 6                     | 33% | ARID1A (2), KMT2C, KMT2D, MRE11A, NCOR1, TDG                              | 2          | 11% | CDH1, FAT3, ITGAV           | 4          | 22% | RB1 (3), CDC27       | 7                   | 39% | PIK3CA(2), AKT1, MAP2K4, MAP3K13, NOTCH2, NTRK2, SF1                                    |
| <b>BRCA2 Ovary</b>         |             |     |                       |     |                                                                           |            |     |                             |            |     |                      |                     |     |                                                                                         |
| LOHneg (n=5)               | 2           | 40% | 3                     | 60% | RPA2, FANCL, TOP3A                                                        | 0          | 0%  | -                           | 0          | 0%  | -                    | 1                   | 20% | NF1                                                                                     |
| LOHpos (n=27)              | 14          | 52% | 9                     | 33% | ATRX (2), ERCC6, FANCD2, FANCE, KMT2A, KMT2C, MSH2, SETDB1                | 2          | 7%  | CDH15, NFASC                | 4          | 15% | RB1 (2), BCL6, CDC27 | 4                   | 15% | NF1 (2), AXIN2, EPHB1, ZFHX3                                                            |

<sup>1</sup>One BRCA2 breast tumor without locus-specific LOH, one BRCA1 breast tumor with locus-specific LOH, and two BRCA1 ovarian tumors with locus-specific LOH were excluded due to having >30% of their mutational signature due to sequencing artifact (all in TCGA dataset).

**Supplementary Table 4: Confirmation of *PTEN* copy number calls by immunohistochemistry**

| <b>Copy number status at <i>PTEN</i> genomic locus</b> | <b>n</b> | <b>PTEN IHC Positive</b> | <b>PTEN IHC Negative</b> | <b>Concordance</b> |
|--------------------------------------------------------|----------|--------------------------|--------------------------|--------------------|
| Heterozygous diploid or copy number gain               | 25       | 24                       | 1                        | 96%                |
| Copy number loss or mutation                           | 10       | 0                        | 10                       | 100%               |
| Copy neutral LOH                                       | 9        | 4                        | 5                        | n/a                |

**Supplementary Table 5: Clinical correlates with *BRCA* locus specific LOH**

| Locus specific LOH            | <i>BRCA1</i> breast |     |                |     | <i>BRCA2</i> breast |     |                |     |
|-------------------------------|---------------------|-----|----------------|-----|---------------------|-----|----------------|-----|
|                               | Present             |     | Absent         |     | Present             |     | Absent         |     |
| n                             | 36                  |     | 5              |     | 18                  |     | 16             |     |
| Avg Age diagnosis ( $\pm$ SD) | 46.2 $\pm$ 11.2     |     | 43.4 $\pm$ 9.9 |     | 49.2 $\pm$ 15.2     |     | 47.8 $\pm$ 9.8 |     |
| Node positive (n, %)          | 6                   | 17% | 1              | 20% | 12                  | 67% | 11             | 69% |
| ER+ (n, %)                    | 9                   | 26% | 2              | 40% | 12                  | 67% | 13             | 81% |
| HER2+ (n, %)                  | 6                   | 17% | 0              | 0%  | 3                   | 17% | 3              | 19% |
| TNBC (n, %)                   | 21                  | 60% | 3              | 60% | 3                   | 17% | 3              | 19% |
| Deceased                      | 6                   | 17% | 0              | 0%  | 1                   | 6%  | 1              | 6%  |

  

| Locus specific LOH            | <i>BRCA1</i> ovary |     |                |     | <i>BRCA2</i> ovary |     |                 |      |
|-------------------------------|--------------------|-----|----------------|-----|--------------------|-----|-----------------|------|
|                               | Present            |     | Absent         |     | Present            |     | Absent          |      |
| n                             | 48                 |     | 4              |     | 27                 |     | 5               |      |
| Avg Age diagnosis ( $\pm$ SD) | 51.0 $\pm$ 8.0     |     | 57.0 $\pm$ 4.6 |     | 56.0 $\pm$ 10.6    |     | 55.8 $\pm$ 11.4 |      |
| Grade 1 or 2 (n, %)           | 8                  | 17% | 0              | 0%  | 1                  | 4%  | 0               | 0%   |
| Deceased                      | 25                 | 52% | 3              | 75% | 10                 | 37% | 5               | 100% |
